# Modeling microbial communities using biochemical resource allocation analysis

Suraj Sharma<sup>1</sup> and Ralf Steuer<sup>1,\*</sup>

<sup>1</sup>Humboldt-Universität zu Berlin, Institut für Biologie, FachInstitut für Theoretische Biologie (ITB), Invalidenstr. 110, 10115 Berlin, Germany

Corresponding author:

Ralf Steuer\*

Email address: [steuer.ralf@hu-berlin.de](mailto:steuer.ralf@hu-berlin.de)

## ABSTRACT

To understand the functioning and dynamics of microbial communities remains a fundamental challenge at the forefront of current biology. To tackle this challenge, the construction of computational models of interacting microbes is an indispensable tool. Currently, however, there is a large chasm between ecologically-motivated descriptions of microbial growth used in ecosystems simulations, and detailed metabolic pathway and genome-based descriptions developed within systems and synthetic biology. Here, we seek to demonstrate how current biochemical resource allocation models of microbial growth offer the potential to advance ecosystem simulations and their parameterization. In particular, recent work on quantitative microbial growth and cellular resource allocation allow us to formulate mechanistic models of microbial growth that are physiologically meaningful while remaining computationally tractable. Biochemical resource allocation models go beyond Michaelis-Menten and Monod-type growth models, and allow to account for emergent properties that underlie the remarkable plasticity of microbial growth. We exemplify our approach using a coarse-grained model of cyanobacterial phototrophic growth, and demonstrate how the model allows us to represent physiological acclimation to different environments, co-limitation of growth by several nutrients, as well as emergent switches between alternative nutrient sources. Our approach has implications for building models of microbial communities to understand their interactions, dynamics and response to environmental changes.

## INTRODUCTION

Microbial organisms and their metabolism are integral parts of the Earth's biogeochemical cycles, and play key roles in almost all ecosystems and environments. Microbial organisms typically form complex, interacting and dynamically changing communities, with examples ranging from the gut microbiome to marine plankton communities. To understand the organizing principles and the functioning of such communities is of paramount importance for a vast number of basic and applied research questions, including questions pertinent to biotechnology, climate change, and human health [28, 61, 21, 56]. Despite the significant advances in our ability to observe and characterize biological systems, however, understanding the interactions and the emergent dynamics of microbial communities remains a fundamental, and truly transdisciplinary, challenge [15, 1, 30, 65, 61].

Traditionally, ecosystem dynamics and microbial communities are the realm of microbial ecology, with a long history and a wealth of results concerning the organization, stability, and functioning of (microbial) ecosystems [28, 58]. In the past century, a variety of modeling approaches have been developed to address fundamental ecological questions, ranging from understanding patterns of biodiversity to predicting the response of ecosystems to changing environmental conditions [16, 15, 30, 58]. Descriptions of microbial growth range from phenomenological 'black box' models to more elaborate trait-based models of growth [15, 30]. It has been noted though, that current theoretical approaches to microbial growth are still dominated by the classic Monod or Michaelis-Menten functional form [1, 22]. While undoubtedly highly successful, Monod-type models of growth exhibit a number of limitations. For example, it has been argued that the constant parameters used in the Monod equation cannot account for the observed plasticity of microbial physiology [5]. Likewise, it has been noted that, despite the significant advances in

47 genome sequencing and quantitative high-throughput methods, the complexity of mechanistic ecosystem  
48 models, and in particular the description of microbial growth within these, have not changed substantially  
49 since they were developed in the 1970s [22].

50 Parallel to progress in theoretical and experimental microbial ecology, the past two decades have  
51 seen an unprecedented advance in our understanding of microbial molecular physiology—mainly driven  
52 by advances in our ability to monitor, measure and modify the inner workings of cells. Theoretical  
53 and computational descriptions of microbial metabolism, facilitated by large-scale metabolic network  
54 reconstruction and constraint-based analysis, have become established tools in molecular systems bi-  
55 ology [45, 60, 8]. Curated genome-scale reconstructions of metabolic networks are available for an  
56 increasing number of microbial organisms [23, 2, 32], and are increasingly recognized as a resource in  
57 studies of microbial communities [64, 56, 21, 65, 61, 33],

58 More recently, also the quantitative physiology of bacterial growth has gained renewed attention, with  
59 numerous studies providing insights into the principles of microbial growth and resource allocation [41,  
60 53, 52, 11, 63]. Key observations concern the 'laws' and trade-offs of microbial growth. In continuation  
61 of the classic studies of bacterial growth physiology, a number of studies have recently addressed the  
62 covariation between the cellular composition and the growth rate of microorganisms [53, 52]. Theoretical  
63 descriptions of microbial resource allocation include coarse-grained models that describe the fundamental  
64 processes of cellular growth by partitioning the proteome into few essential classes [38, 35, 59, 50, 11], as  
65 well as large-scale constraint-based models that take into account the costs and benefits of each individual  
66 gene [18, 42, 19, 49]. In particular, the concept of resource balance analysis [18, 19] and related methods,  
67 such as such as metabolism and macromolecular expression models [42], show that quantitative models  
68 that predict protein expression and the cellular composition are feasible on the genome-scale—and can  
69 be extended to time-varying environments [49]. As yet, however, quantitative modeling of microbial  
70 resource allocation is mostly restricted to well characterized model organisms in typical laboratory or  
71 biotechnological environments.

72 The purpose of this work is therefore to outline a bridge between these recent studies on microbial  
73 resource allocation and current models of microbial ecology. We argue that biochemical resource alloca-  
74 tion models offer significant potential to advance ecosystem simulations beyond current applications of  
75 constraint-based analysis of microbial metabolism. In particular, we seek to demonstrate that biochemical  
76 resource allocation models, as defined below, can be constructed and parameterized for large classes  
77 of microbial organisms based on available biochemical and physiological data; and are, unlike Monod-  
78 type models, capable to exhibit emergent properties of growth, such as switching between alternative  
79 sources of nutrients. Our study is motivated by recent calls for a new generation of plankton models  
80 to better capture the emergent properties of marine ecosystems [1, 22]. As will be demonstrated below,  
81 biochemical resource allocation models follow the rationale described by Allen and Polimene [1] to  
82 design a generic cell model that captures the essence of key physiological activities and that is based on a  
83 robust physiological formulation of competing physiological activities — and therefore should be able to  
84 reproduce biogeochemical and ecological dynamics as emergent properties.

85 The paper is organized as follows: In the first section, we briefly recapitulate computational models of  
86 microbial growth. In the second section, we provide an overview of metabolic network reconstruction  
87 and recent biochemical models of cellular resource allocation. In the following section, we consider  
88 a coarse-grained model of phototrophic (cyanobacterial) growth and describe its parameterization. In  
89 the subsequent section, we then discuss emergent properties of the model, in particular cellular growth  
90 laws and co-limitation, as well as the representation of microbial diversity and the uptake of alternative  
91 nutrients. In the sixth and seventh sections, we present a brief case study: the co-existence of two  
92 phytoplankton species with a gleaner-opportunist trade-off. In the final section, we provide a discussion  
93 and outlook.

## 94 MODELS OF MICROBIAL GROWTH

Assuming a chemostat-like setting, the growth dynamics of a population of (genetically homogeneous and well mixed) cells can be described by an ordinary differential equation,

$$\frac{d\rho}{dt} = \mu \cdot \rho - D \cdot \rho \quad , \quad (1)$$

where  $\rho$  denotes the concentration of cells (in units of cells per volume),  $\mu$  denotes the specific growth rate and  $D$  is the dilution or death rate. The specific growth rate  $\mu$  is a function of the respective environment, and depends on the concentrations of one or more nutrients. Typically, a limiting nutrient  $n$  with concentration  $[n]$  is considered that is supplied with the inflow of fresh medium at a concentration  $[n_x]$ . The respective nutrient dynamics are described by

$$\frac{d[n]}{dt} = D \cdot ([n_x] - [n]) - Y^{-1} \cdot \mu \cdot \rho \quad , \quad (2)$$

95 where  $Y$  denotes the yield coefficient, defined as the number of microbial cells (or units biomass) per unit  
96 of nutrient. The model can be readily extended to multiple microbial strains with concentrations  $\rho_i$  and  
97 several nutrients  $n_k$ . The dynamics of a chemostat have been studied extensively [58] and equations of  
98 the form (1) and (2), as well as the respective extension to multiple strains and nutrients, are commonly  
99 utilized in ecosystem simulations [16, 15, 58, 57].

To evaluate the dynamics of the system requires knowledge of the specific growth rate  $\mu$  as a function of the concentration of the limiting nutrient  $n$ . To this end, the most widely used approach is still to make use of the hyperbolic dependency proposed by Jacques Monod in 1949 [39],

$$\mu([n]) = \frac{\mu^{\max} \cdot [n]}{K_A + [n]} \quad , \quad (3)$$

where  $\mu^{\max}$  denotes the maximum specific growth rate of the microorganism in this environment and  $K_A$  denotes the half-saturation constant. The Monod equation is identical to the Michaelis-Menten equation of enzyme kinetics and represents an empirical description of microbial growth. Its constant parameters are typically estimated for specific environmental conditions and reflect a particular strain or species and its functional traits related to nutrient uptake and growth [5, 30]. Over the past decades, there have been several advances and alternative formulations of growth models, such as the Droop model [9] that introduces internal nutrient quotas. For phototrophic microorganisms, modifications are typically required to account for the effects of photoinhibition—the decrease of the specific growth rate for high light intensities [11]. A widely equation for phototrophic growth in dependence of the light intensity  $I$  is the Haldane equation,

$$\mu(I) = \frac{\mu^{\max} \cdot I}{K_A + I + (I/K_I)^2} \quad , \quad (4)$$

100 where  $K_I$  denotes the impact of photoinhibition. In the absence of photoinhibition ( $K_I \rightarrow \infty$ ) the model is  
101 identical to the Monod equation with light as the limiting substrate. See, for example, Lee et al. [29] for a  
102 review on empirical growth models and their parameterization for different microalgae. The use of the  
103 Monod and related equations remain ubiquitous in current models of ecosystems [16, 5, 12, 30, 22, 57]. It  
104 has been emphasized recently [1, 22], however, that empirical growth models do not necessarily reflect our  
105 vast recent increase in knowledge about the quantitative physiology of microbial growth. The challenge  
106 before us is therefore to combine the conceptual simplicity of empirical growth models with molecular  
107 properties of microbial growth.

## 108 METABOLIC RECONSTRUCTIONS AND CELLULAR RESOURCE ALLOCA- 109 TION

110 Models of microbial and phytoplankton growth that incorporate internal structure and aspects of physi-  
111 ology are not new. Examples include the (still empirical) model of Droop [9] as well as other 'internal-quota'  
112 models—each representing a cell with one or more internal variables, and typically allowing for ad-  
113 justments in the composition of cellular biomass [15]. Likewise, models that incorporate cost-benefit  
114 consideration have been proposed, most notably by JA Raven [48] and RJ Geider [17]. In the follow-  
115 ing, we build on these ideas and incorporate recent approaches to biochemical models of microbial  
116 growth [8, 60].

117 In particular, over the past two decades, genome-scale reconstructions (GMRs) of microbial metabolism  
118 have reached maturity and are available for a rapidly increasing number of (sequenced) microbial organ-  
119 isms. GMRs provide a comprehensive account of biochemical interconversions between small molecules

120 (metabolites) within a cell or organism, and therefore allow to accurately estimate the stoichiometric  
121 and energetic synthesis costs of cellular constituents. GMRs have been highly successful to predict  
122 maximal growth yields of microbial organisms and other properties of biotechnological relevance [45].  
123 More recently, large-scale constraint-based resource allocation models [18, 42, 19, 49] were introduced  
124 that allow to predict protein expression and cell compositions of microbes in specified (albeit, with the  
125 exception of [50, 49], constant) environments. These models are based on the insight that the (maximal)  
126 flux of an enzyme-catalyzed biochemical reaction is typically constraint by the amount of the respective  
127 enzyme. Since enzymes are itself the products of metabolism, incorporating enzyme-dependent flux  
128 constraints gives rise to a self-consistent description of microbial growth: for any given growth rate  
129  $\mu$  the set of cellular enzymes must be sufficient to sustain the synthesis of the required precursors to  
130 allow for the translation of the set of catalyzing enzymes itself, as well as for the synthesis of all other  
131 (non-enzymatic) compounds within a cell.

More formally, the synthesis rate of a cellular protein  $P_k$  can be described by the equation

$$\frac{d[P_k]}{dt} = \gamma_k - \mu \cdot [P_k] \quad , \quad (5)$$

132 where  $\gamma_k$  denotes the translation rate of the protein that is required to match the dilution term  $\mu \cdot [P_k]$   
133 cellular growth (protein degradation can be readily included but is neglected in the following). The sum  
134 of all translation rates is constrained by the available ribosomal capacity and hence by the number of  
135 ribosomes.

To account for the synthesis of metabolic precursors and other cellular components, the interconversion  
of internal metabolites  $m$  is described by a stoichiometric matrix  $N$  and a vector  $v$  that denotes the rates  
of (spontaneous or enzyme-catalyzed) interconversion rates,

$$\frac{d[m]}{dt} = N \cdot v - \mu \cdot [m] \quad . \quad (6)$$

136 Typically, intracellular metabolism is assumed to be at steady state and the dilution terms for intracellular  
137 metabolites are neglected due to the high turnover of metabolites compared to their dilution by growth. In  
138 this case, the mass-balance constraint on intracellular reaction fluxes simplifies to  $N \cdot v = 0$ .

To account for biochemical resource allocation, the rates of those reactions that are catalyzed by  
proteins are constrained by the amount of the respective catalyzing proteins

$$v_k \leq k_{\text{cat},k} \cdot P_k \quad , \quad (7)$$

where  $k_{\text{cat},k}$  denotes the specific activity of the enzyme or protein. The maximal uptake rate  $v_T$  of an  
external nutrient  $n_x$  can be further constrained by the concentration of the respective nutrient and the  
amount of the respective transporter complex  $P_T$ .

$$v_T \leq \frac{[n_x]}{K_M + [n_x]} \cdot k_{\text{cat},T} \cdot P_T \quad . \quad (8)$$

139 The uptake constraints can be modified to, for example, also account for diffusion limitations of nutrient  
140 uptake described by Bonachela et al. [5]. The constraints and equations summarized above, together with  
141 the assumption of a constant cell density, provide a quantitative description of microbial growth that is  
142 based on linear constraints. To obtain an estimate of the growth rate for a specific environment, the model  
143 is solved using the assumption that, during evolution, the fluxes are organized such that they give rise to  
144 a maximal growth rate in the respective environment (assumption of evolutionary optimality). Hence,  
145 similar to flux-balance analysis [45] and other constraint-based analysis, the assumption of optimality  
146 replaces unknown regulatory mechanisms.

147 The required parameters for model construction are: (i) the metabolic network (as encoded in the  
148 stoichiometric matrix  $N$  and the associated enzyme-reaction relationships). These data are available as  
149 part of a metabolic network reconstruction; (ii) the composition of the catalyzing enzymes (in terms of  
150 amino acids and possible co-factors). For most enzymes this information is readily available and part of  
151 reaction databases; as well (iii) as the specific activity  $k_{\text{cat}}$  of each catalyzing enzyme and, if required,  
152 the half-saturation constants for transporter reactions. While quantitative data is still scarce, in particular  
153 for non-model organisms, specific activities for a wide range of enzymes can be sourced from suitable



179 proteins by ribosomes (R), which are itself protein complexes. The fraction of non-enzymatic proteins  
 180 is represented by a (quota) protein component  $P_Q$ . The remaining biomass is lumped into a metabolic  
 181 component  $Q$  that is synthesized from the cellular precursor  $C_3$  by the protein complex  $M_Q$ . All proteins  
 182 complexes represent aggregates of individual proteins. The model assumes a constant cellular density.  
 183 The specific growth rate is not dependent on cell size, but cell size may constraints parameters, such as  
 184 the surface to volume ratio. The full set of equations is provided in the Materials and Methods.

All enzyme-catalyzed reactions are constrained by the amount of the respective enzymes. For example, carbon uptake is constrained by the equation

$$v_{TC} \leq \frac{[C_x]}{K_C + [C_x]} \cdot k_{cat,TC} \cdot [T_C] \quad (9)$$

where  $[T_C]$  denotes the amount of uptake transporter (in molecules per cell),  $k_{cat,TC}$  denotes the specific catalytic activity of the transport, and  $K_C$  denotes the half-saturation constant of the uptake complex. We note that Equation (9) provides an upper limit only, the actual flux can be less (for example by inactivating a fraction of the uptake transporter). Likewise, additional constraints can be included, such as an upper limit on the uptake flux induced by diffusion limitations [5]. Other intracellular reactions are constrained by the upper limits induced by the amount of the respective enzymes, e.g., for the carbon assimilation reaction

$$v_{CB} \leq k_{cat,CB} \cdot [CB] \quad (10)$$

185 The model is parameterized using information about the individual enzymatic and biochemical  
 186 processes. Using data from Faizi et al. [11], the effective size of the (coarse-grained) protein complexes  
 187 can be approximated by the number of enzymes involved in amino acid synthesis multiplied with the  
 188 average size (in units of amino acids) per enzyme. Catalytic turnover numbers  $k_{cat}$  are assigned according  
 189 to typical values for the respective reactions. For example, the rate of translation per ribosome is  
 190 approximately 20 amino acids per second, the photosynthetic unit (with photosystems II as rate limiting  
 191 complex) is assumed to give rise to approximately 250 interconversion per second, the  $k_{cat,TC}$  of the  
 192 carbon transporter is set to  $20s^{-1}$ , the catalytic activity of the central metabolism is set to  $k_{cat,MC}$  is set to  
 193  $10s^{-1}$ . Reasonable parameter ranges for many enzymatic processes (for a generic cell) can be obtained,  
 194 for example, from Milo and Phillips [37]. The full set of parameters used in the following is provided in  
 195 the Materials and Methods.

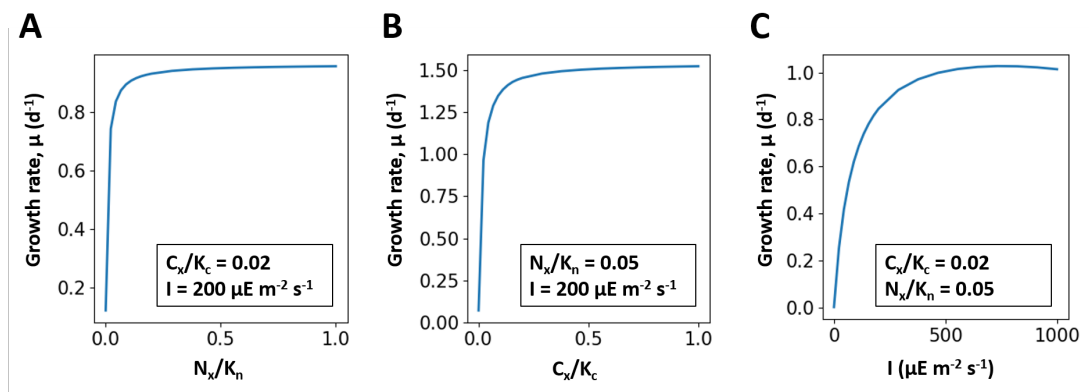

**Figure 2.** The maximal specific growth rate  $\mu$  as a function of extracellular nutrient concentrations ( $N_x$  and  $C_x$ ) and light intensities  $I$ . Nutrient concentrations are reported relative to the half-saturation constant of the respective transporter complex. **Panel A:** The specific growth rate  $v(N_x/K_n)$  with fixed  $I = 200 \mu E m^{-2} s^{-1}$  and  $C_x/K_c = 0.02$ . **Panel B:** The specific growth rate  $v(C_x/K_c)$  with fixed  $N_x/K_n = 0.05$  and light intensity  $I = 200 \mu E m^{-2} s^{-1}$ . **Panel C:** The specific growth rate  $v(I)$  with fixed  $C_x/K_c = 0.02$  and  $N_x/K_n = 0.05$ . Abbreviations:  $N_x$ , external nitrogen concentration;  $K_n$ , half-saturation constant of nitrogen transporter;  $C_x$ , external inorganic carbon concentration; and  $K_c$ , half-saturation constant of carbon transporter.

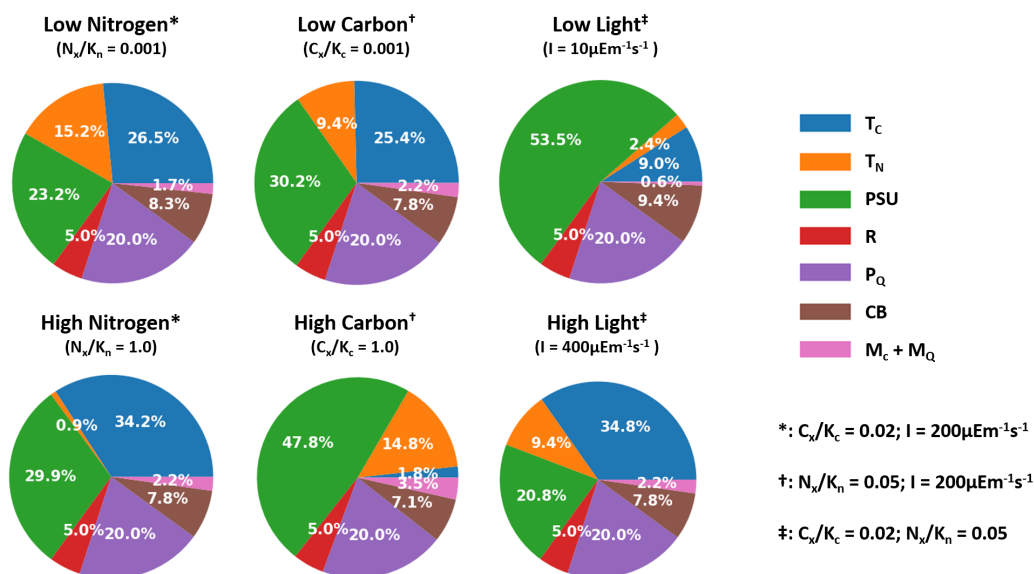

**Figure 3.** Cellular protein allocation in dependence of environmental conditions. Shown are the relative abundances of ribosomes and coarse-grained protein complexes under different growth conditions (relative to total protein but excluding the constant protein fraction  $T_Q$ ). The superscripts (\*, † and ‡) indicate the parameter values used to specify environmental conditions.

196 Given the stoichiometric constraints and the assigned parameters, the model gives rise to a global  
 197 optimization problem, and solved as a series of LP problems to identify the maximal specific growth rate  
 198  $\mu$  in dependence of the availability of extracellular nitrogen and carbon and light intensity  $I$  (assumption  
 199 of evolutionary optimality). Figure 2 shows the resulting growth curves as a function of environmental  
 200 parameters. Similar to previous models [11], the resulting growth curves with respect to external nitrogen  
 201 ( $N_x$ ) and carbon ( $C_x$ ) concentrations are consistent with Monod kinetics, the dependence of the specific  
 202 growth rate on the light intensity is consistent with the Haldane equation.

203 We emphasize that the growth curves shown in Figure 2 are emergent properties of the underlying  
 204 constraints and parameters—and that changes in these constraints and parameters entail (sometimes  
 205 complex) changes in overall growth properties. For example, the apparent half-saturation constant of the  
 206 organismal growth curve is markedly different from the half-saturation constant assigned to the respective  
 207 transporter complex, due to the fact that the cells can acclimate to low nutrient conditions by changing the  
 208 expression of the respective protein complex.

## 209 ACCLIMATION, TRADE-OFFS AND CO-LIMITATION

210 Biochemical resource allocation models go beyond describing nutrient uptake and the specific growth  
 211 rate, and allow us to obtain insights into acclimation, co-limitation and cellular trade-offs. In particular,  
 212 concomitant to the cellular growth curves, we obtain the distribution of protein resources within the cell  
 213 as a function of environmental parameters and growth rate.

214 Figure 3 and Table 1 show the relative protein fractions invested into the different biochemical  
 215 processes dependent on environmental conditions. The resource allocation framework allows the model  
 216 to acclimate to the respective environmental condition and invest cellular resources into processes that  
 217 would otherwise limit growth. As a consequence, the maximal uptake rate of the nitrogen transporter  
 218 complex ( $V_{\max} = k_{\text{cat},T_N} \cdot [T_N]$ ) and hence the affinity  $A = V_{\max}/K_N$  for the extracellular nitrogen source is  
 219 not constant, but increases with decreasing external concentrations. Figure 4A shows the maximal uptake  
 220 rate  $V_{\max}$ , as well as the actual uptake flux, as a function of extracellular nitrogen. Similar to the analysis  
 221 by Bonachela et al. [5], and unlike descriptions using the Monod equation, the model accounts for the  
 222 acclimation of the cell to low nutrient availability—with important consequences for, e.g., estimations  
 223 of phytoplankton abundances in global ocean models. Likewise, protein investments in light harvesting

**Table 1.** Cellular protein allocation in dependence of environmental conditions. Values denote the relative abundance (% relative to total proteome) of protein complexes under low and high nutrient conditions. The symbols hold same meaning as Figure 1.

| Protein     | Low      |        |       | High     |        |       |
|-------------|----------|--------|-------|----------|--------|-------|
|             | Nitrogen | Carbon | Light | Nitrogen | Carbon | Light |
| $T_C$       | 26.5     | 25.4   | 9.0   | 34.2     | 1.8    | 34.8  |
| $T_N$       | 15.2     | 9.4    | 2.4   | 0.9      | 14.8   | 9.4   |
| PSU         | 23.2     | 30.2   | 53.5  | 29.9     | 47.8   | 20.8  |
| R           | 5.0      | 5.0    | 5.0   | 5.0      | 5.0    | 5.0   |
| $P_Q$       | 20.0     | 20.0   | 20.0  | 20.0     | 20.0   | 20.0  |
| CB          | 8.3      | 7.8    | 9.4   | 7.8      | 7.1    | 7.8   |
| $M_C + M_Q$ | 1.7      | 2.2    | 0.6   | 2.2      | 3.5    | 2.2   |

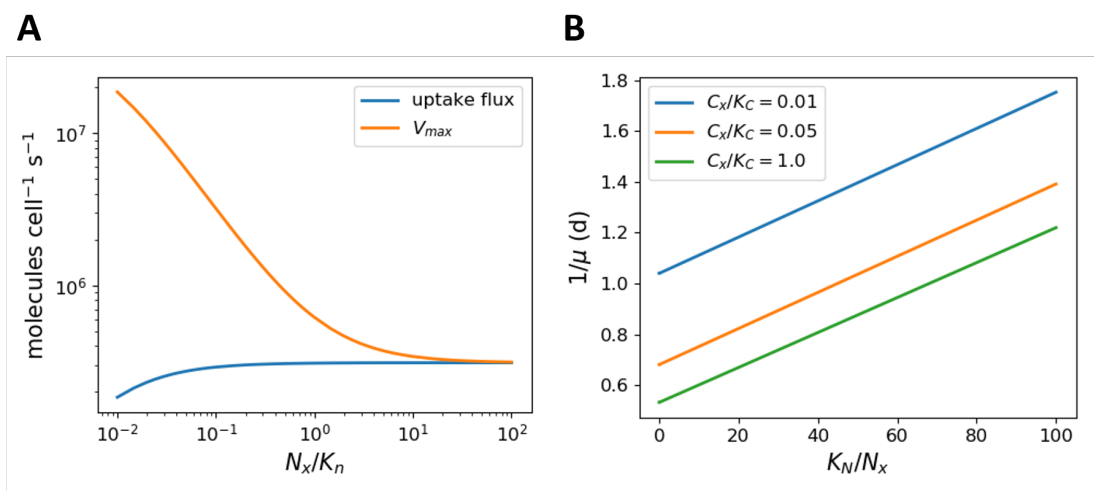

**Figure 4. Panel A:** The maximal uptake capacity  $V_{\max}$  of the nitrogen transport complex ( $V_{\max} = k_{\text{cat},\text{TN}} \cdot [T_N]$ ) versus the actual uptake rate as a function of external nitrogen. For scarce nutrients more cellular resources are invested into the uptake capacity. **Panel B:** A Lineweaver-Burk plot of the (inverse of the) growth rate versus the (inverse of the) relative substrate concentration,  $K_N/N_x$ , for different values of external inorganic carbon. Parallel lines in a Lineweaver-Burk plot correspond to uncompetitive inhibition, whereas a multiplicative dependence of the growth rate on its substrates would result in lines with a identical x-intercept.

224 strongly depend on the light intensity, at the expense of investments in other metabolic processes (Table 1).

Closely related to trade-offs in resource allocation, it is an important challenge for empirical growth models to describe the dependence of growth on several potentially limiting nutrients, see Saito et al. [51] for a discussion on the concept and types of co-limitation. The most common ways to implement multiple limitation scenarios relies on either Liebig's law of the minimum,

$$\mu = \min \left( \frac{\mu_1^{\max} [n_1]}{K_{m1} + [n_1]}, \frac{\mu_2^{\max} [n_2]}{K_{m2} + [n_2]} \right), \quad (11)$$

or the multiplicative form

$$\mu = \mu^{\max} \cdot \frac{[n_1]}{K_{m1} + [n_1]} \cdot \frac{[n_2]}{K_{m2} + [n_2]}, \quad (12)$$

225 where  $[n_1]$  and  $[n_2]$  denote the concentrations of two potentially limiting nutrients and  $K_{m1}$   $K_{m2}$  the  
226 respective half-saturation constants, respectively. As discussed by Saito et al. [51] both forms are not



227 without problems and there is no clear empirical evidence to assess the merits of either representation.  
228 Given its simplicity, the multiplicative form is commonly employed in multi-nutrient models [16, 57].

229 For biochemical resource allocation models, however, the description of growth limitations as a  
230 function of two or more nutrients emerges without further assumptions about the functional form of  
231 growth equations. In particular, the coarse-grained model described above is not consistent with Liebig's  
232 law of the minimum, as growth on a single nutrient, as shown in Figure 2, does not exhibit any hard  
233 threshold. The absence of such a threshold is due to the fact that, for scarce nutrients, resources are  
234 increasingly invested into the respective uptake reactions.

235 More relevant, however, the emergent growth curve is also not consistent with a multiplicative  
236 functional form. Figure 4B shows a Lineweaver-Burk plot of the growth rate as a function of nitrogen  
237 availability for different values of the external carbon concentration. Parallel lines in a Lineweaver-Burk  
238 plot correspond to uncompetitive inhibition, whereas a multiplicative functional form would result in lines  
239 with an identical x-intercepts. Hence, the absence of carbon acts analogous to uncompetitive inhibition,  
240 and affects both, the apparent organismal half-saturation constant of growth, as well as the maximal  
241 growth rate of the cell—again with important consequences for, e.g., growth limitations and nutrient  
242 dynamics in coupled ecosystem models.

## 243 METABOLIC DIVERSITY AND THE COST OF REGULATION

244 Recent studies have emphasized microbial community diversity as a fundamental property of model  
245 ecosystems [15]. Several principles and mechanisms allow to represent microbial diversity in biochemical  
246 resource allocation models. As shown above, cells may acclimate to different environmental conditions,  
247 resulting in an inhomogeneous population. If required, the possibility for physiological acclimation can  
248 also be restricted within simulations, for example by allowing only limited ranges for intracellular protein  
249 complexes (as would be expected, for example, for cyanobacterial *Prochlorococcus* strains).

250 More importantly, however, cellular diversity also arises due to genetically-encoded differences  
251 between organisms. Firstly, diversity may arise due to differences in enzyme-kinetic parameters. The  
252 evolution of enzyme-kinetic parameters is constrained by physicochemical limits that result in trade-  
253 offs between parameters, with the protein complex ribulose-1,5-bisphosphate carboxylase/oxygenase  
254 (RuBisCO) as a prominent example [14]. As will be shown below, these differences result in different  
255 cellular growth curves. Secondly, microbial organisms exhibit metabolic diversity with respect to the  
256 encoded metabolic functionality within their genomes. As shown by recent studies of the cyanobacterial  
257 pan-genome and pan-metabolism [3, 55, 4], genome sizes differ significantly—reflecting the different  
258 adaptations and lifestyles of organisms. Differences in the set of encoded proteins give rise to different  
259 metabolic strategies that are accessible to the organism, for example with respect to the modes of energy  
260 generation [13], or accessibility of nutrient sources.

261 To demonstrate the emergent switch based metabolic strategies, based on the possibilities encoded  
262 in the genome, we consider phototrophic growth with two alternative sources of extracellular nitrogen.  
263 We assume that, in addition to the nitrogen source  $N_x$  considered above, there is a second source of  
264 extracellular nitrogen  $N_y$ , whose uptake and conversion to the intracellular nitrogen precursor  $N$  is  
265 facilitated by a coarse-grained protein complex  $T_Y$ . Compared to the complex  $T_N$ , however, the synthesis  
266 of  $T_Y$  requires more amino acids and its catalytic turnover number  $k_{\text{cat}}$  is lower. Within their genome,  
267 strains may encode either of the two (coarse-grained) uptake protein complexes,  $T_N$  or  $T_Y$ , or both. The  
268 respective strains are denoted as  $(T_N)$ -strain,  $(T_Y)$ -strain and  $(T_N+T_Y)$ -strain. The inclusion of both protein  
269 complexes within the genome, however, entails additional cellular costs: a larger genome corresponds  
270 to a (slightly) higher fraction of the non-protein biomass  $Q$ . Moreover, additional protein machinery is  
271 required to facilitate cellular decision to control the expression of both enzyme complexes, resulting in an  
272 increased fraction of non-catalyzing proteins  $P_Q$ . The parameterization of the strains is provided in the  
273 Materials and Methods.

274 In the following, we assume that the extracellular nitrogen source  $N_y$  is constantly available (analogous  
275 to, e.g., atmospheric dinitrogen), whereas the availability of the nitrogen source  $N_x$  varies. Figure 5  
276 shows the growth curves of all three strains as a function of  $N_x$  in the presence of a basal availability  
277 of  $N_y$  (Figure 5A), as well as the expression of the respective uptake complexes for the  $(T_N+T_Y)$ -strain  
278 (Figure 5B). As expected, the  $(T_Y)$ -strain exhibits a constant growth rate, due to the constant basal  
279 availability of  $N_Y$ . The  $(T_N)$ -strain exhibits a Monod-type dependence on the availability of  $N_x$ , as already  
280 shown in Figure 2. The combined  $(T_N+T_Y)$ -strain, however, exhibits a switch between two growth regimes:

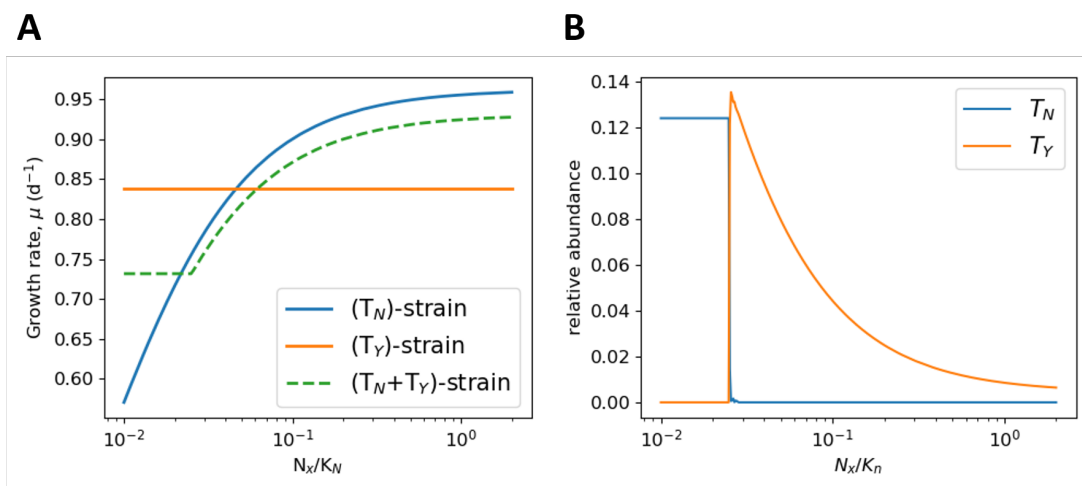

**Figure 5. Panel A:** The predicted specific growth rate of three different cyanobacterial strains at different concentrations of the external nitrogen source  $N_x$  and a basal supply of the alternative nitrogen source  $N_y$ . The strains are denoted as  $(T_N)$ -strain,  $(T_Y)$ -strain and  $(T_N+T_Y)$ -strain, and encode either a single uptake mechanism ( $T_N$  or  $T_Y$ ) or both within their genomes. The  $T_N+T_Y$ -strain has a higher biosynthesis cost in terms of increased genome size and additional regulatory proteins and hence exhibits a reduced specific growth rate compared to the streamlines strains. **Panel B:** Relative abundance (with respect to total proteome) of the nitrogen uptake mechanisms  $T_N$  and  $T_Y$  for the  $(T_Y)$ -strain. The expression of the respective proteins depends on the environmental conditions.

281 for low availability of external  $N_x$ , the strain expresses the protein complex  $T_Y$  and utilizes the nitrogen  
 282 source  $N_Y$ . In this regime, the (constant) specific growth rate is slightly below the rate observed for  
 283 the  $(T_Y)$ -strain due to the increased burden of non-catalytic biomass. If the availability of  $N_x$  exceeds  
 284 a certain threshold, the  $(T_N+T_Y)$ -strain switches its preferred nitrogen source and expresses the protein  
 285 complex  $T_N$ . The growth rate then increases with increasing availability of  $N_x$ , though it always remains  
 286 below the growth rate of the  $(T_N)$ -strain (again due to the increased burden of non-catalytic biomass).  
 287 Hence, we expect that the  $(T_N+T_Y)$ -strain will be outcompeted in any constant environment, but will have  
 288 a competitive advantage in (some) environments with variable nitrogen availability.

289 For our purposes, the example serves to illustrate the following points: (i) biochemical resource  
 290 allocation models build upon the genome of an organism and hence allow us to represent genetic diversity  
 291 within strains, including genomes that encode several potential metabolic strategies and differences in  
 292 genome size; (ii) the associated costs of larger genomes, including the costs for additional expression  
 293 of regulatory proteins can be incorporated into the parameterization of the model based on pan-genome-  
 294 analysis and quantitative growth studies [31, 4, 63]; (iii) The optimal metabolic strategy for any given  
 295 environment does not have to be specified in advance but is an emergent outcome of model simulation.  
 296 Strains may switch between different strategies in different environments—with important consequences  
 297 for ecosystem models; (iv) we observe that, within simulations, cells typically exhibit a hierarchy of  
 298 preferred nutrients. That is, optimal solutions are not combinations of different uptake mechanisms.  
 299 This behavior was previously proven for a different, but closely related, class of resource allocation  
 300 models [62, 40], and is reminiscent of the phenomenon of catabolite repression. To what extent the  
 301 hierarchy of preferred nutrients is a universal feature of microbial growth is insufficiently understood.

## 302 A CASE STUDY: SEASONAL VARIATION AND CO-EXISTENCE

303 To exemplify the feasibility to utilize biochemical resource allocation models within ecosystems simula-  
 304 tions, we consider a model of phytoplankton diversity recently proposed by Tsakalakis et al. [57]. We  
 305 do not aim to recapitulate the full study of Tsakalakis et al. [57], but focus on the competition outcomes  
 306 between opportunists (r-strategists) and gleaners (K-strategists) in constant versus time-varying environ-  
 307 ments. As shown above, the growth physiology of biochemical resource allocation models is an emergent  
 308 property of the underlying biochemical parameters. We therefore assume that the biochemical parameters

309 of carbon uptake, as well as nitrogen metabolism and uptake, differs between strains—reflecting the  
 310 diversity of strains. As noted above, our premise is that enzyme-kinetic parameters are subject to physico-  
 311 chemical trade-offs, for example trade-offs between the half-saturation constant and the maximal catalytic  
 312 rate of an enzyme. We emphasize that such trade-offs are not an outcome of our modelling approach but  
 313 need to be specified independently, for example based on detailed biochemical surveys and analysis [14].

314 We consider two strains of phytoplankton. The differences between both strains (detailed in Materials  
 315 and Methods and Table 2) reflect trade-offs in the half-saturation constants and catalytic activities of the  
 316 uptake mechanisms of nitrogen and carbon, and result in two functional groups of phytoplankton, gleaners  
 317 and opportunists. The respective growth curves are shown in Figure 6. Gleaners are characterised by a  
 318 higher affinity towards extracellular nitrogen, and an overall lower maximal growth rate. Opportunists are  
 319 characterised by a high overall specific growth rate, but a lower affinity for extracellular nitrogen.

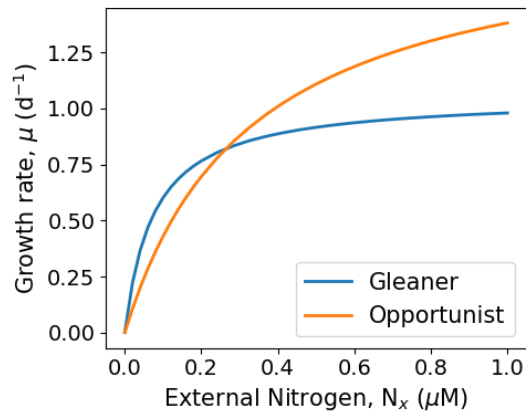

**Figure 6.** The growth curves of two competing strains of phytoplankton, opportunists and gleaners, in dependence of external nitrogen availability. The strains differ in the enzyme-kinetic parameters of their constituent enzyme complexes. Gleaners (K-strategists) have a growth advantage during phases of low external nitrogen availability, whereas opportunists (r-strategists) have a growth advantage at high concentrations of external nitrogen.

Following Tsakalakis et al. [57], we simulate the growth of both strains in two different environments: a constant light environment (control) and a light environment with seasonal variations in average light intensity. Extracellular inorganic carbon is assumed to be constant, a (single) source of extracellular nitrogen is supplied via a constant influx. The dynamics of the abundances of gleaners ( $\rho_G$ ) and opportunists ( $\rho_O$ ) are described by the following ODEs

$$\begin{aligned} \frac{d\rho_G}{dt} &= \mu_G \cdot \rho_G - D \cdot \rho_G \\ \frac{d\rho_O}{dt} &= \mu_O \cdot \rho_O - D \cdot \rho_O \end{aligned} \quad (13)$$

the dynamics of external nitrogen is described by

$$\frac{d[N_x]}{dt} = V_N - D \cdot [N_x] - v_{n,O} \cdot \rho_O - v_{n,G} \cdot \rho_G \quad (14)$$

320 where  $V_N$  denotes a constant influx, and  $v_{n,O}$  and  $v_{n,G}$  denote the specific cellular uptake rates (as emerging  
 321 from the respective models) of external nitrogen by the gleaners and opportunists, respectively. The  
 322 population dynamics of both strains in constant and time-varying environments are shown in Figure 7.  
 323 Simulations were performed using a Python ODE solver, the growth models are implemented a (series of)  
 324 LP problems and solved at each time step. The procedure is computationally similar to dynamic FBA  
 325 (dFBA), an established method for constraint-based analysis [34]. See Materials and Methods for details.

326 As shown in Figure 7, gleaners outcompete opportunists in a constant light environment, consistent  
 327 with the competitive exclusion principle. Seasonally changing light intensities, however, induce changes in  
 328 strain abundances, and hence nitrogen availability. Temporal changes in nitrogen availability then result in  
 329 the co-existence of both strains. During periods of low light availability, overall strain abundance decrease

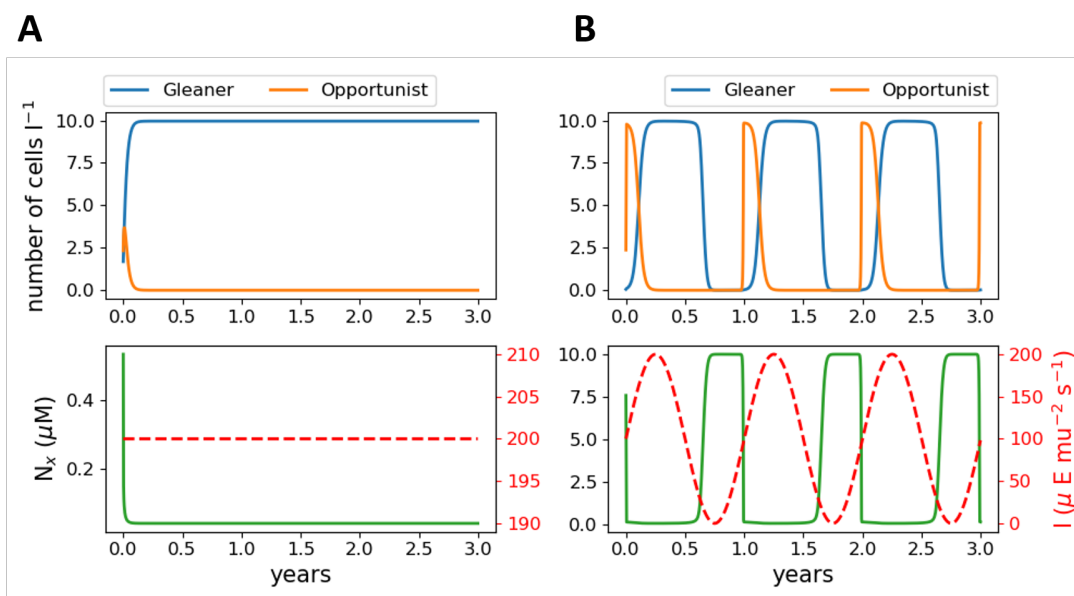

**Figure 7.** Population dynamics of opportunists and gleaners under different nutrient and light conditions. **Panel A:** shows competitive exclusions for constant light ( $I = 200\mu Em^{-2}s^{-1}$ ), with the gleaner strain outcompeting the opportunist. **Panel B:** shows the co-existence of both strains. Whereas, the lower right panel shows the changes in the nitrogen concentration under the changing conditions of light intensities. All simulations are performed using the parameters given in Table 2.

330 and the availability of extracellular nitrogen increases. With increasing light intensities, opportunists  
 331 have a competitive advantage and quickly increase in abundance, thereby decreasing the availability of  
 332 extracellular nitrogen and shifting the competitive advantage to gleaners until a decreasing light intensity  
 333 restart the cycle. The simulation results are consistent the the corresponding simulations of Tsakalakis  
 334 et al. [57] and demonstrate the feasibility to utilize biochemical resource allocation models in ecosystem  
 335 simulations.

## 336 DISCUSSION AND OUTLOOK

337 As emphasized by Follows and Dutkiewicz [15], there is currently a vast chasm between the ecologically  
 338 and biogeochemically oriented parameterizations of growth utilized in ecological modelling and the  
 339 metabolic-pathway perspective of microbial growth enabled by systems biology and modern genomics.  
 340 The purpose of this study was to outline a connection between both fields and to show how recent biochemical  
 341 models of microbial growth might contribute to close this chasm. In this respect, of particular interest  
 342 are resource allocation models of microbial growth [18, 59, 49, 8, 11]. Biochemical resource allocation  
 343 models allow us to provide a quantitative account of protein expression and biochemical processes based  
 344 on knowledge about biochemical parameters. Our aim was to heed the call of Allen and Polimene [1]  
 345 to provide growth models based on a robust physiological formulation that allow for trade-offs between  
 346 resource allocation of competing physiological activities. We propose that biochemical resource allocation  
 347 models, such as the ones described here, fulfill this paradigm towards a new generation of plankton models.  
 348 While mechanistic growth models [54], resource-allocation and cost-benefit analysis [48, 17, 15, 30], as  
 349 well as models based on optimality [46, 47], are well established in ecological modelling, the resource  
 350 allocation models described here directly build upon the framework of metabolic network reconstruction  
 351 and constraint-based analysis—and therefore reflect the advances in quantitative growth physiology  
 352 enabled by systems biology and modern genomics. The predictions from biochemical resource allocation  
 353 models are often in excellent agreement with detailed physiological studies of model strains [19, 63]  
 354 making them a good starting point for the description of microbial growth.

355 Biochemical resource allocation models can be formulated for almost all microbial strains for which a  
 356 reference genome is available. Supported by recent analysis of the cyanobacterial pan-genome [3, 55, 4],

357 and the diversity of energy metabolism in microbes [13], we hypothesize that such models will follow a  
358 modular paradigm: there is only a limited number of fundamentally different metabolic strategies available  
359 and microbial organisms are a mix-and-match conglomerate of these strategies (with many combinations  
360 excluded for biophysical or energetic reasons). The enormous diversity of microbial metabolism then  
361 arises from further variations and adaptations of biochemical parameters (with possible trade-offs), as well  
362 as from differences in cellular resource allocation. For example, recent studies show that the observed  
363 significant differences in the maximal specific growth rates between genetically similar cyanobacterial  
364 strains are related linked to differences in resource allocation strategies (such as the amount of storage  
365 compounds or differences in the PSII/PSI ratio) [63]. We note, however, that variability and possible  
366 trade-offs in enzyme-kinetic parameters are not an intrinsic part of biochemical resource allocation  
367 models but have to be provided as external—all based on detailed biochemical studies [14]. The analysis  
368 of biochemical resource allocation models therefore distinguishes between trade-offs that arise from  
369 physicochemical constraints in enzyme evolution and trade-offs that arise from differences in protein  
370 expression and resource allocation.

371 The merits of biochemical resource allocation models are as follows: (I) the models can be formulated  
372 using different levels of complexity, from genome-scale representations taking into account all individual  
373 enzymes [19, 49], to intermediate representations [50], to coarse-grained models that consider protein  
374 complexes corresponding to (agglomerated) cellular processes, such as the model outlined above; (II)  
375 model parameterization is based on available knowledge provided in biochemical databases [26]  
376 and our increasing knowledge about quantitative cell physiology [37]. The models therefore provide a  
377 link between physicochemical constraints of enzyme-kinetic parameters and observed growth kinetics.  
378 Key parameters for model parameterization are enzyme costs (in terms of amino-acids and co-factor  
379 requirements) and enzymatic catalytic activities. Information about regulatory mechanisms is not required;  
380 (III) the models allow to represent metabolic diversity by taking distributions of parameters (and possible  
381 trade-offs) into account. Biochemical resource allocation models therefore allow to implement selection-  
382 based approaches [15]—following the Baas-Becking paradigm “everything is everywhere but environment  
383 selects” (cited after Follows and Dutkiewicz [15]); (IV) biochemical resource allocation models allow  
384 for complex metabolic behavior, such as switches between different metabolic strategies. Most microbes  
385 are capable of more than one metabolic mode and conventional Monod-type models face difficulties to  
386 describe transitions between metabolic modes. For biochemical resource allocation models the modes of  
387 energy generation or nutrient uptake strategies (and hierarchies) emerge without further specification as  
388 part of the optimization procedure. (V) the latter also allows model to be embedded within evolutionary  
389 simulation to explain how different metabolic strategies and strains with different genome sizes may  
390 emerge and co-exist. (VI) biochemical resource allocation models of the form discussed here only  
391 require linear optimization and hence are computationally tractable. While it is (currently) not possible to  
392 formulate kinetic models at the genome-scale, the implementation of biochemical resource allocation  
393 models is computationally feasible even for large models [19, 49]. Coarse-grained models, such as the  
394 one discussed above, can be solved fast and efficiently and hence are suitable for ecosystems simulations.  
395 In case computational capacity is limiting, it is possible to devise approximate schemes (such as lookup  
396 tables).

397 Notwithstanding their merits, current biochemical resource allocation models are not (yet) the panacea  
398 for ecological simulations. We expect that different approaches are needed, as well as further improve-  
399 ments of biochemical resource allocation models and other whole-cell systems biology models. In  
400 particular, current biochemical resource allocation models can be extended along the following lines: (I)  
401 current simulations typically focus on steady state analysis. While it has been shown, that biochemical  
402 resource allocation models can be solved for time-varying environments [50, 49], the computational  
403 burden is significant. Nonetheless, it is paramount importance to be able to represent phenomena such  
404 as storage, bet-hedging or luxury uptake of scarce nutrients (i.e, the uptake of nutrient beyond what  
405 is currently required in anticipation of possible future limitations). These phenomena are also aspects  
406 of resource allocation strategies and hence can be represented by appropriate models. (II) currently  
407 models are based on a metabolic perspective of growth. In principle, also trade-offs between growth  
408 and other cellular properties can be considered, such as the resilience against stress or predation. (III)  
409 a better understanding of physicochemical trade-offs in enzyme-kinetic parameters is required. Further  
410 quantitative growth studies, along the lines of Zavřel et al. [63] are required to quantify the cost of  
411 regulation for strains with different genome sizes.

412 Overall, we envision a unified framework to construct biochemical resource allocation models based  
 413 on reference genomes and suitable biochemical parameterizations. Such models will allow us to represent  
 414 the microbial diversity observed in almost all environments and will open up new avenues to interface  
 415 biogeochemical and ecological questions with recent knowledge obtained from quantitative microbial  
 416 growth physiology.

## 417 MATERIALS AND METHODS

### 418 Biochemical resource allocation models

419 The implementation of the resource allocation models follows the algorithms described in [18, 50, 49]. A  
 420 model consists of two types of components: steady-state metabolites and cellular macromolecules (which  
 421 include catalytic protein complexes and quota components). We assume that the internal metabolites are at  
 422 a quasi-steady state, *i.e.*, metabolism readjustments are faster than changes in the external environmental.  
 423 Thus, the concentrations of internal metabolites are not explicitly evaluated in the model, and the metabolic  
 424 network is assumed to be balanced at all times. We neglect dilution by growth of internal metabolites. The  
 425 quota components (protein  $P_Q$  and remaining biomass  $Q$ ) fulfill no explicit function within our model and  
 426 their synthesis is enforced using fixed quotas (except otherwise noted, the quota protein component  $P_Q$  is  
 427 assumed to be 20% of total protein, the non-protein biomass  $Q$  is assumed to be 50% of total biomass).

### 428 The biochemical resource allocation model of phototrophic growth

The biochemical resource allocation model shown in Figure 1 is assembled following the stoichiometry  
 and data described by Faizi et al. [11]. We note that the model of Faizi et al. [11] is a nonlinear kinetic  
 ODE model, hence computationally different from the model described here. Growth is facilitated by 8  
 protein complexes: 6 enzyme and transport complexes, ribosomes  $R$  and a non-catalyzing quota protein  
 component  $P_Q$ . The enzyme and transporter catalyze the following reactions:

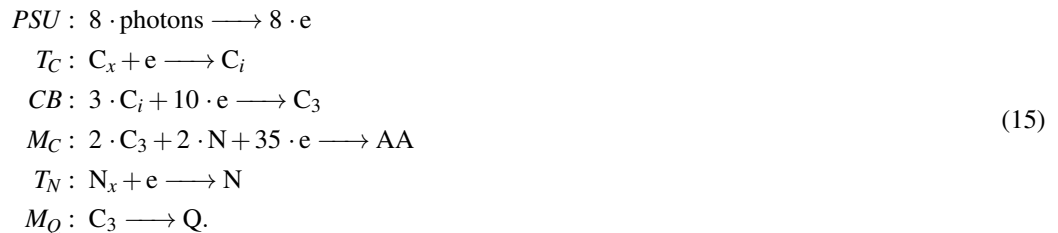

Protein translation is described by the equation

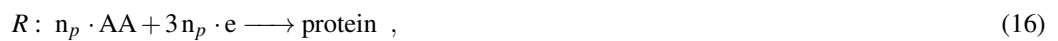

429 where  $n_p$  denotes the size of the respective protein in amino acids.

### 430 Capacity constraints of catalytic enzymes

All enzyme-catalyzed reactions are constrained by the amount of the respective enzyme, according to  
 equation (7). The constraints for uptake and light harvesting reactions also depend on the availability of  
 the respective substrates. In particular, for (i) the uptake of inorganic carbon,

$$v_{TC} \leq \frac{C_x}{K_C + C_x} \cdot k_{cat,TC} \cdot T_C, \tag{17}$$

(ii) for uptake of extracellular nitrogen,

$$v_n \leq \frac{N_x}{K_N + N_x} \cdot k_{cat,TN} \cdot T_N, \tag{18}$$

and (iii) and for light harvesting and photosynthesis

$$\begin{aligned}
 v_{PSU} &\leq \frac{k_{cat,PSU} \cdot \sigma I}{\sigma I + k_{cat,PSU} + k_d \cdot \sigma I} \cdot PSU \\
 v_d &= \frac{k_d (\sigma I)^2}{\sigma I + k_{cat,PSU} + k_d \cdot \sigma I} \cdot PSU .
 \end{aligned} \tag{19}$$

431 The equation for light harvesting and photosynthesis is derived from a two-state model of photosynthesis  
 432 that accounts for photodamage, see [11] for a derivation.

The constraints on the ribosomal capacity are

$$\sum_p \gamma_p \cdot n_p \leq \gamma^{\max} \cdot R \quad (20)$$

433 where  $n_p$  denotes the protein size (in amino acids per molecule),  $\gamma_p$  its translation rate, and  $\gamma^{\max}$  denotes  
 434 the maximal translation rate of ribosomes. We note that all capacity constraints can be implemented as  
 435 linear constraints.

**Table 2.** Parameters of the model. The parameter values follow the data used in Faizi et al. [11]. If no data were available in the literature, the remaining parameters are estimated<sup>o</sup> based on generic values.

| Symbol         | Definition                                                                        | Gleaner/Control      | Opportunist          | Source |
|----------------|-----------------------------------------------------------------------------------|----------------------|----------------------|--------|
| $V_{cell}$     | Cell volume ( $\mu m^3$ )                                                         | 1.8                  | 1.8                  | [7]    |
| $D$            | Rate of dilution ( $d^{-1}$ )                                                     | 0.25                 | 0.25                 | [10]   |
| $d$            | Average cell density ( <i>aa cell</i> <sup>-1</sup> )                             | $1.4 \times 10^{10}$ | $1.4 \times 10^{10}$ | [11]   |
| $k_d$          | Rate of photo damage                                                              | 0.56                 | 0.56                 | ◇      |
| $\sigma$       | Effective absorption ( $m^2 \mu mol PSU^{-1}$ )                                   | 0.2                  | 0.2                  | ◇      |
| $n_{PSU}$      | Size of photosynthetic unit <i>PSU</i> ( <i>aa molec</i> <sup>-1</sup> )          | 95451                | 95451                | [11]   |
| $n_{TC}$       | Size of carbon transporter $T_c$ ( <i>aa molec</i> <sup>-1</sup> )                | 1681                 | 1681                 | [11]   |
| $n_{CB}$       | Size of Calvin-Benson (CB) proteins ( <i>aa molec</i> <sup>-1</sup> )             | 2000                 | 2000                 | ◇      |
| $n_c$          | Size of carbon metabolism ( $M_c$ ) proteins ( <i>aa molec</i> <sup>-1</sup> )    | 20000                | 20000                | ◇      |
| $n_{TN}$       | Size of nitrogen transporter $T_n$ ( <i>aa molec</i> <sup>-1</sup> )              | 10000                | 10000                | ◇      |
| $n_P$          | Size of protein P ( <i>aa molec</i> <sup>-1</sup> )                               | 1000                 | 1000                 | ◇      |
| $n_q$          | Size of metabolism protein $M_q$ ( <i>aa molec</i> <sup>-1</sup> )                | 20000                | 20000                | ◇      |
| $n_R$          | Size of ribosome $R$ ( <i>aa molec</i> <sup>-1</sup> )                            | 7358                 | 7358                 | [11]   |
| $\gamma_{max}$ | Maximal translation rate ( <i>aa s</i> <sup>-1</sup> <i>molec</i> <sup>-1</sup> ) | 22                   | 22                   | [6]    |
| $K_C$          | Half-saturation constant of $T_c$ ( $\mu M$ )                                     | 15                   | 15                   | [44]   |
| $K_N$          | Half-saturation constant of $T_n$ ( $\mu M$ )                                     | 10                   | 50                   | ◇      |
| $k_{cat,PSU}$  | Turnover rate of <i>PSU</i> ( $s^{-1}$ )                                          | 250                  | 250                  | [37]   |
| $k_{cat,TC}$   | Turnover rate of $T_c$ ( $s^{-1}$ )                                               | 20                   | 200                  | ◇      |
| $k_{cat,CB}$   | Turnover rate of <i>CB</i> ( $s^{-1}$ )                                           | 1                    | 1                    | ◇      |
| $k_{cat,MC}$   | Turnover rate of $M_c$ ( $s^{-1}$ )                                               | 10                   | 10                   | [37]   |
| $k_{cat,TN}$   | Turnover rate of $T_n$ ( $s^{-1}$ )                                               | 50                   | 200                  | ◇      |
| $k_{cat,P}$    | Turnover rate of $P_q$ ( $s^{-1}$ )                                               | 100                  | 100                  | ◇      |
| $k_{cat,Q}$    | Turnover rate of $M_q$ ( $s^{-1}$ )                                               | 100                  | 100                  | ◇      |
| $Q$            | Relative abundance of $Q$ w.r.t. biomass                                          | 0.5                  | 0.5                  | ◇      |
| $P_Q$          | Relative abundance of $P_Q$ w.r.t. total proteome                                 | 0.2                  | 0.2                  | ◇      |

#### 436 Solving the resource allocation model as a LP

For any given set of external parameters  $C_x$ ,  $N_x$ ,  $I$  and specific growth rate  $\mu$ , the model implemented as a linear program  $LP(\mu)$ . The problem is described by three matrices  $\mathbf{N}$ ,  $\mathbf{B}$ , and  $\mathbf{C}$ , the vector of reaction rates  $\mathbf{v} = (v_i, \gamma_k)^T$  (including metabolic and translation rates), and the vector  $\mathbf{P}$  of macromolecules. The constraints are

$$\mathbf{N} \cdot \mathbf{v} = \mathbf{B} \cdot \begin{bmatrix} \mathbf{0} \\ \mathbf{P} \end{bmatrix}, \quad (21)$$

$$\mathbf{v} \geq \mathbf{0} \quad (22)$$

$$\mathbf{C} \cdot \mathbf{v} \leq \mathbf{P} \quad \text{with} \quad \mathbf{P} = (R, T_N, T_C, PSU, M_C, M_Q, CB, P_Q, Q)^T \quad (23)$$

$$\mathbf{P} \geq \mathbf{P}^{lb} \quad \text{with} \quad \mathbf{P}^{lb} = (R^{lb}, T_N^{lb}, T_C^{lb}, PSU^{lb}, M_C^{lb}, M_Q^{lb}, CB^{lb}, P_Q^{lb}, Q^{lb})^T \quad (24)$$

$$\boldsymbol{\omega} \cdot \mathbf{P} = d. \quad (25)$$

437 Constraint (21) enforces mass-balance at steady-state, including terms for dilution (with dilution of  
 438 metabolites neglected). The matrix  $\mathbf{B}$  is a diagonal matrix with elements  $\mu$  on the diagonal. Constraint  
 439 (23) described the (linear) enzymatic capacity constraints, the matrix  $\mathbf{C}$  is largely diagonal, except for  
 440 the constraints on the translation rate. Constraint (24) provides a lower bound for the abundance of each  
 441 macromolecules (which is zero except for the quota components). Constraint (22) ensures positive fluxes  
 442 in the LP problem. Constraint (25) enforces a constant cell density. The vector  $\boldsymbol{\omega}$  described the sizes of  
 443 the macromolecules (in units of amino acids per molecule) and  $d$  denotes the cell density (in units of  
 444 amino acids per cell).

445 The above described LP is solved as a feasibility problem for a given  $\mu$ . To obtain a solution for the  
 446 maximal specific growth rate in a given environment, the global optimum of  $\mu$  is found using bisection,  
 447 analogous to the method used in [50, 49].

### 448 Model parameterization

449 A complete list of model parameters is provided in Table 2. Parameterization follow the data used in Faizi  
 450 et al. [11]. The size of macromolecules is estimated using the size of an average enzyme times the  
 451 approximate number of steps used in the pathway. The size of the protein complex  $P_Q$  and the biomass  
 452 component  $Q$  is arbitrary. Turnover rates are chosen according to average values described in [37]. The  
 453 description of the photosystem is adopted from Faizi et al. [11], with  $\sigma$  denoting the effective absorption  
 454 cross-section per photosystems, and  $k_d$  the rate of photodamage.

455 To simulate the growth on two alternative sources of external nitrogen, we used the set of additional  
 456 parameters given in Table 3.

**Table 3.** Specific parameters used to model growth on two alternative sources of external nitrogen. The remaining parameters are same as described in Table 2

| Symbol       | Definition                                        | $(T_N)$ -strain | $(T_Y)$ -strain | $(T_N + T_Y)$ -strain |
|--------------|---------------------------------------------------|-----------------|-----------------|-----------------------|
| $e_N$        | Energy units per uptake reaction $T_N$            | 1               | –               | 1                     |
| $e_Y$        | Energy units per uptake reaction $T_Y$            | –               | 2               | 2                     |
| $k_{cat,TY}$ | Turnover number of $T_N$ ( $s^{-1}$ )             | –               | 30              | 30                    |
| $k_{cat,TN}$ | Turnover number of $T_N$ ( $s^{-1}$ )             | 50              | –               | 50                    |
| $n_{TN}$     | Size of $T_N$ ( $aa \text{ molec}^{-1}$ )         | 10000           | –               | 10000                 |
| $n_{TY}$     | Size of $T_Y$ ( $aa \text{ molec}^{-1}$ )         | –               | 20000           | 20000                 |
| $Q$          | Relative abundance of $Q$ w.r.t. biomass          | 0.5             | 0.5             | 0.6                   |
| $P_Q$        | Relative abundance of $P_Q$ w.r.t. total proteome | 0.2             | 0.2             | 0.22                  |

### 457 The computational modelling framework

458 A computational model is developed using Python as a programming language. The framework uses  
 459 functionality from the following packages: numpy [43], scipy [27], matplotlib [25], pandas [36], sundials  
 460 [24] and Gurobi [20]. In particular, we use Gurobi for solving the LP-based optimisation and CVODE  
 461 integrator from the sundials package to solve the system of ODEs. The version of the modelling framework  
 462 used to produce the results presented in this manuscript is publicly available with instructions to install  
 463 and run simulations at (<https://github.com/surajsept/cyanoRBA>). The development version is hosted on  
 464 GitLab (<https://gitlab.com/surajsept/RBmodels>) and people interested in contributing can request access  
 465 by contacting the author (S.S.).



## REFERENCES

- 466 [1] Allen, J. I. and Polimene, L. (2011). Linking physiology to ecology: towards a new generation of  
467 plankton models. *Journal of Plankton Research*, 33(7):989–997.
- 468 [2] Arkin, A. P., Cottingham, R. W., Henry, C. S., Harris, N. L., Stevens, R. L., Maslov, S., Dehal, P.,  
469 Ware, D., Perez, F., Canon, S., Sneddon, M. W., Henderson, M. L., Riehl, W. J., Murphy-Olson, D.,  
470 Chan, S. Y., Kamimura, R. T., Kumari, S., Drake, M. M., Brettin, T. S., Glass, E. M., Chivian, D.,  
471 Gunter, D., Weston, D. J., Allen, B. H., Baumohl, J., Best, A. A., Bowen, B., Brenner, S. E., Bun, C. C.,  
472 Chandonia, J. M., Chia, J. M., Colasanti, R., Conrad, N., Davis, J. J., Davison, B. H., DeJongh, M.,  
473 Devoid, S., Dietrich, E., Dubchak, I., Edirisinghe, J. N., Fang, G., Faria, J. P., Frybarger, P. M., Gerlach,  
474 W., Gerstein, M., Greiner, A., Gurtowski, J., Haun, H. L., He, F., Jain, R., Joachimiak, M. P., Keegan,  
475 K. P., Kondo, S., Kumar, V., Land, M. L., Meyer, F., Mills, M., Novichkov, P. S., Oh, T., Olsen, G. J.,  
476 Olson, R., Parrello, B., Pasternak, S., Pearson, E., Poon, S. S., Price, G. A., Ramakrishnan, S., Ranjan,  
477 P., Ronald, P. C., Schatz, M. C., Seaver, S. M. D., Shukla, M., Sutormin, R. A., Syed, M. H., Thomason,  
478 J., Tintle, N. L., Wang, D., Xia, F., Yoo, H., Yoo, S., and Yu, D. (2018). KBase: The United States  
479 Department of Energy Systems Biology Knowledgebase. *Nat. Biotechnol.*, 36(7):566–569.
- 480 [3] Beck, C., Knoop, H., Axmann, I. M., and Steuer, R. (2012). The diversity of cyanobacterial metabolism:  
481 genome analysis of multiple phototrophic microorganisms. *BMC Genomics*, 13:56.
- 482 [4] Beck, C., Knoop, H., and Steuer, R. (2018). Modules of co-occurrence in the cyanobacterial pan-  
483 genome reveal functional associations between groups of ortholog genes. *PLoS Genet.*, 14(3):e1007239.
- 484 [5] Bonachela, J. A., Raghiv, M., and Levin, S. A. (2011). Dynamic model of flexible phytoplankton  
485 nutrient uptake. *Proc. Natl. Acad. Sci. U.S.A.*, 108(51):20633–20638.
- 486 [6] Bremer, H. and Dennis, P. (2008). Feedback control of ribosome function in escherichia coli. *Biochimie*,  
487 90(3):493–499.
- 488 [7] Brown, C. M., Lawrence, J. E., and Campbell, D. A. (2006). Are phytoplankton population density  
489 maxima predictable through analysis of host and viral genomic dna content? *Journal of the Marine*  
490 *Biological Association of the United Kingdom*, 86(3):491–498.
- 491 [8] de Jong, H., Casagrande, S., Giordano, N., Cinquemani, E., Ropers, D., Geiselman, J., and Gouzé,  
492 J.-L. (2017). Mathematical modelling of microbes: metabolism, gene expression and growth. *Journal*  
493 *of the Royal Society, Interface*, 14(136).
- 494 [9] Droop, M. R. (1973). SOME THOUGHTS ON NUTRIENT LIMITATION IN ALGAE. *Journal of*  
495 *Phycology*, 9(3):264–272.
- 496 [10] Edwards, K. F., Thomas, M. K., Klausmeier, C. A., and Litchman, E. (2012). Allometric scaling  
497 and taxonomic variation in nutrient utilization traits and maximum growth rate of phytoplankton.  
498 *Limnology and Oceanography*, 57(2):554–566.
- 499 [11] Faizi, M., Zavřel, T., Loureiro, C., Červený, J., and Steuer, R. (2018). A model of optimal protein  
500 allocation during phototrophic growth. *Biosystems*, 166:26–36.
- 501 [12] Fiksen, , Follows, M. J., and Aksnes, D. L. (2013). Trait-based models of nutrient uptake in microbes  
502 extend the michaelis-menten framework. *Limnology and Oceanography*, 58(1):193–202.
- 503 [13] Flamholz, A., Noor, E., Bar-Even, A., Liebermeister, W., and Milo, R. (2013). Glycolytic strategy as  
504 a tradeoff between energy yield and protein cost. *Proc. Natl. Acad. Sci. U.S.A.*, 110(24):10039–10044.
- 505 [14] Flamholz, A., Prywes, N., Moran, U., Davidi, D., Bar-On, Y., Oltrogge, L., Alves, R., Savage, D.,  
506 and Milo, R. (2018). Revisiting tradeoffs in rubisco kinetic parameters. *bioRxiv*.
- 507 [15] Follows, M. J. and Dutkiewicz, S. (2011). Modeling diverse communities of marine microbes. *Ann*  
508 *Rev Mar Sci*, 3:427–451.
- 509 [16] Follows, M. J., Dutkiewicz, S., Grant, S., and Chisholm, S. W. (2007). {E}mergent biogeography of  
510 microbial communities in a model ocean. *Science*, 315(5820):1843–1846.
- 511 [17] Geider, R. J., Moore, C. M., and Ross, O. N. (2009). The role of cost–benefit analysis in models of  
512 phytoplankton growth and acclimation. *Plant Ecology & Diversity*, 2(2):165–178.
- 513 [18] Goelzer, A. and Fromion, V. (2011). Bacterial growth rate reflects a bottleneck in resource allocation.  
514 *Biochim. Biophys. Acta*, 1810(10):978–988.
- 515 [19] Goelzer, A., Muntel, J., Chubukov, V., Jules, M., Prestel, E., Nolker, R., Mariadassou, M., Aymerich,  
516 S., Hecker, M., Noirot, P., Becher, D., and Fromion, V. (2015). Quantitative prediction of genome-wide  
517 resource allocation in bacteria. *Metab. Eng.*, 32:232–243.
- 518 [20] Gurobi Optimization, L. (2018). Gurobi optimizer reference manual.
- 519 [21] Hanemaaijer, M., Roling, W. F., Olivier, B. G., Khandelwal, R. A., Teusink, B., and Bruggeman,
- 520

- 521 F. J. (2015). Systems modeling approaches for microbial community studies: from metagenomics to  
522 inference of the community structure. *Front Microbiol*, 6:213.
- 523 [22] Hellweger, F. L. (2017). 75 years since Monod: It is time to increase the complexity of our predictive  
524 ecosystem models (opinion). *Ecological Modelling*, 346:77–87.
- 525 [23] Henry, C. S., DeJongh, M., Best, A. A., Frybarger, P. M., Lindsay, B., and Stevens, R. L. (2010). High-  
526 throughput generation, optimization and analysis of genome-scale metabolic models. *Nat. Biotechnol.*,  
527 28(9):977–982.
- 528 [24] Hindmarsh, A. C., Brown, P. N., Grant, K. E., Lee, S. L., Serban, R., Shumaker, D. E., and Woodward,  
529 C. S. (2005). SUNDIALS: Suite of nonlinear and differential/algebraic equation solvers. *ACM*  
530 *Transactions on Mathematical Software (TOMS)*, 31(3):363–396.
- 531 [25] Hunter, J. D. (2007). Matplotlib: A 2d graphics environment. *Computing In Science & Engineering*,  
532 9(3):90–95.
- 533 [26] Jeske L., Placzek S., S. I. C. A. S. D. (2019). BRENDA in 2019: a European ELIXIR core data  
534 resource. *Nucleic Acids Res.*
- 535 [27] Jones, E., Oliphant, T., Peterson, P., et al. (2001–). SciPy: Open source scientific tools for Python.  
536 [Online; accessed `today`].
- 537 [28] Konopka, A. (2019). What is microbial community ecology? *The ISME Journal*, 3:1223–1230.
- 538 [29] Lee, E., Jalalizadeh, M., and Zhang, Q. (2015). Growth kinetic models for microalgae cultivation: A  
539 review. *Algal Research*, 12:497–512.
- 540 [30] Litchman, E., Edwards, K. F., and Klausmeier, C. A. (2015). Microbial resource utilization traits and  
541 trade-offs: implications for community structure, functioning, and biogeochemical impacts at present  
542 and in the future. *Front Microbiol*, 6:254.
- 543 [31] Lynch, M. and Marinov, G. K. (2015). The bioenergetic costs of a gene. *Proc. Natl. Acad. Sci. U.S.A.*,  
544 112(51):15690–15695.
- 545 [32] Magnusdottir, S., Heinken, A., Kutt, L., Ravcheev, D. A., Bauer, E., Noronha, A., Greenhalgh, K.,  
546 Jager, C., Baginska, J., Wilmes, P., Fleming, R. M., and Thiele, I. (2017). Generation of genome-scale  
547 metabolic reconstructions for 773 members of the human gut microbiota. *Nat. Biotechnol.*, 35(1):81–89.
- 548 [33] Magnusdottir, S. and Thiele, I. (2018). Modeling metabolism of the human gut microbiome. *Curr.*  
549 *Opin. Biotechnol.*, 51:90–96.
- 550 [34] Mahadevan, R., Edwards, J. S., and Doyle, F. J. (2002). Dynamic Flux Balance Analysis of Diauxic  
551 Growth in *Escherichia coli*. *Biophysical Journal*, 83(3):1331–1340.
- 552 [35] Maitra, A. and Dill, K. A. (2015). Bacterial growth laws reflect the evolutionary importance of energy  
553 efficiency. *Proc. Natl. Acad. Sci. U.S.A.*, 112(2):406–411.
- 554 [36] McKinney, W. (2010). Data structures for statistical computing in python. In van der Walt, S. and  
555 Millman, J., editors, *Proceedings of the 9th Python in Science Conference*, pages 51 – 56.
- 556 [37] Milo, R. and Phillips, R. (2015). *Cell Biology by the Numbers*. Garland Science.
- 557 [38] Molenaar, D., van Berlo, R., de Ridder, D., and Teusink, B. (2009). Shifts in growth strategies reflect  
558 tradeoffs in cellular economics. *Mol. Syst. Biol.*, 5:323.
- 559 [39] Monod, J. (1949). The Growth of Bacterial Cultures. *Annual Review of Microbiology*, 3(1):371–394.
- 560 [40] Muller, S., Regensburger, G., and Steuer, R. (2014). Enzyme allocation problems in kinetic metabolic  
561 networks: optimal solutions are elementary flux modes. *J. Theor. Biol.*, 347:182–190.
- 562 [41] Neidhardt, F. C. (1999). Bacterial growth: constant obsession with  $dn/dt$ . *J. Bacteriol.*, 181:7405–  
563 7408.
- 564 [42] O’Brien, E. J., Lerman, J. A., Chang, R. L., Hyduke, D. R., and Palsson, B. . (2013). Genome-scale  
565 models of metabolism and gene expression extend and refine growth phenotype prediction. *Mol. Syst.*  
566 *Biol.*, 9:693.
- 567 [43] Oliphant, T. (2006–). NumPy: A guide to NumPy. USA: Trelgol Publishing. [Online; accessed  
568 `today`].
- 569 [44] Omata, T., Takahashi, Y., Yamaguchi, O., and Nishimura, T. (2002). Structure, function and  
570 regulation of the cyanobacterial high-affinity bicarbonate transporter, *bct1*. *Functional plant biology*,  
571 29(3):151–159.
- 572 [45] Orth, J. D., Thiele, I., and Palsson, B. . (2010). What is flux balance analysis? *Nat. Biotechnol.*,  
573 28(3):245–248.
- 574 [46] Pahlow, M. (2005). Linking chlorophyll-nutrient dynamics to the red:chl *a*:*b* ratio with a model of  
575 optimal phytoplankton growth. *Marine Ecology-progress Series - MAR ECOL-PROGR SER*, 287:33–

- 576 43.
- 577 [47] Pahlow, M. and Oschlies, A. (2013). Optimal allocation backs droop's cell-quota model. *Marine*  
578 *Ecology Progress Series*, 473:1–5.
- 579 [48] Raven, J. A. (1984). A cost-benefit analysis of photon absorption by photosynthetic unicells. *New*  
580 *Phytol.*, 98:593–626.
- 581 [49] Reimers, A.-M., Knoop, H., Bockmayr, A., and Steuer, R. (2017). Cellular trade-offs and optimal  
582 resource allocation during cyanobacterial diurnal growth. *Proceedings of the National Academy of*  
583 *Sciences of the United States of America*, 114(31):E6457.
- 584 [50] Rügen, M., Bockmayr, A., and Steuer, R. (2015). Elucidating temporal resource allocation and  
585 diurnal dynamics in phototrophic metabolism using conditional FBA. *Sci Rep*, 5:15247.
- 586 [51] Saito, M. A., Goepfert, T. J., and Ritt, J. T. (2008). Some thoughts on the concept of colimitation:  
587 Three definitions and the importance of bioavailability. *Limnol. Oceanogr.*, 53(1):276–290.
- 588 [52] Schaechter, M. (2015). A brief history of bacterial growth physiology. *Front. Microbiol.*, 6:289.
- 589 [53] Scott, M. and Hwa, T. (2011). Bacterial growth laws and their applications. *Curr. Opin. Biotechnol.*,  
590 22:559–565.
- 591 [54] Shuler, M. L., Leung, S., and Dick, C. C. (1979). A mathematical model for the growth of a single  
592 bacterial cell\*. *Annals of the New York Academy of Sciences*, 326(1):35–52.
- 593 [55] Simm, S., Keller, M., Selymes, M., and Schleiff, E. (2015). The composition of the global and  
594 feature specific cyanobacterial core-genomes. *Front Microbiol*, 6:219.
- 595 [56] Succurro, A. and Ebenhoh, O. (2018). Review and perspective on mathematical modeling of microbial  
596 ecosystems. *Biochem. Soc. Trans.*, 46(2):403–412.
- 597 [57] Tsakalakis, I., Pahlow, M., Oschlies, A., Blasius, B., and Ryabov, A. B. (2018). Diel light cycle  
598 as a key factor for modelling phytoplankton biogeography and diversity. *Ecological Modelling*,  
599 384:241–248.
- 600 [58] Wade, M., Harmand, J., Benyahia, B., Bouchez, T., Chaillou, S., Cloez, B., Godon, J.-J., Boudjemaa,  
601 B. M., Rapaport, A., Sari, T., Arditi, R., and Lobry, C. (2016). Perspectives in mathematical modelling  
602 for microbial ecology. *Ecological Modelling*, 321:64 – 74.
- 603 [59] Weiße, A. Y., Oyarzún, D. A., Danos, V., and Swain, P. S. (2015). Mechanistic links between cellular  
604 trade-offs, gene expression, and growth. *Proc. Natl. Acad. Sci. U.S.A.*, 112(9):E1038–47.
- 605 [60] Westermarck, S. and Steuer, R. (2016). Toward Multiscale Models of Cyanobacterial Growth: A  
606 Modular Approach. *Frontiers in bioengineering and biotechnology*, 4:95.
- 607 [61] Widder, S., Allen, R. J., Pfeiffer, T., Curtis, T. P., Wiuf, C., Sloan, W. T., Cordero, O. X., Brown,  
608 S. P., Momeni, B., Shou, W., Kettle, H., Flint, H. J., Haas, A. F., Laroche, B., Kreft, J. U., Rainey,  
609 P. B., Freilich, S., Schuster, S., Milferstedt, K., van der Meer, J. R., Großkopf, T., Huisman, J., Free,  
610 A., Picioreanu, C., Quince, C., Klapper, I., Labarthe, S., Smets, B. F., Wang, H., and Soyer, O. S.  
611 (2016). Challenges in microbial ecology: building predictive understanding of community function  
612 and dynamics. *ISME J*, 10(11):2557–2568.
- 613 [62] Wortel, M. T., Peters, H., Hulshof, J., Teusink, B., and Bruggeman, F. J. (2014). Metabolic states  
614 with maximal specific rate carry flux through an elementary flux mode. *FEBS J.*, 281(6):1547–1555.
- 615 [63] Zavřel, T., Faizi, M., Loureiro, C., Poschmann, G., Stühler, K., Sinetova, M., Zorina, A., Steuer, R.,  
616 and Červený, J. (2018). Quantitative insights into the cyanobacterial cell economy. *bioRxiv*.
- 617 [64] Zomorodi, A. R. and Maranas, C. D. (2012). OptCom: a multi-level optimization framework for the  
618 metabolic modeling and analysis of microbial communities. *PLoS Comput. Biol.*, 8(2):e1002363.
- 619 [65] Zomorodi, A. R. and Segrè, D. (2016). Synthetic ecology of microbes: Mathematical models and  
620 applications. *Journal of Molecular Biology*, 428(5, Part B):837 – 861. Engineering Tools and Prospects  
621 in Synthetic Biology.
